# Supplementary material for: Notch Inhibition Enhances Cardiac Reprogramming by Increasing MEF2C Transcriptional Activity
Source: PubMed Central journal article supplement — Stem Cell Reports. 2017 Mar 2;8(3):548–60. doi: 10.1016/j.stemcr.2017.01.025 (PMC5355682; doi:10.1016/j.stemcr.2017.01.025), 2017-03-02
Supplement: mmc1.pdf [file mmc1.pdf]

**Stem Cell Reports, Volume 8**

**Supplemental Information**

**Notch Inhibition Enhances Cardiac Reprogramming by Increasing  
MEF2C Transcriptional Activity**

**Maria Abad, Hisayuki Hashimoto, Huanyu Zhou, Maria Gabriela Morales, Beibei Chen, Rhonda Bassel-Duby, and Eric N. Olson**

## SUPPLEMENTAL DATA

### SUPPLEMENTAL FIGURES

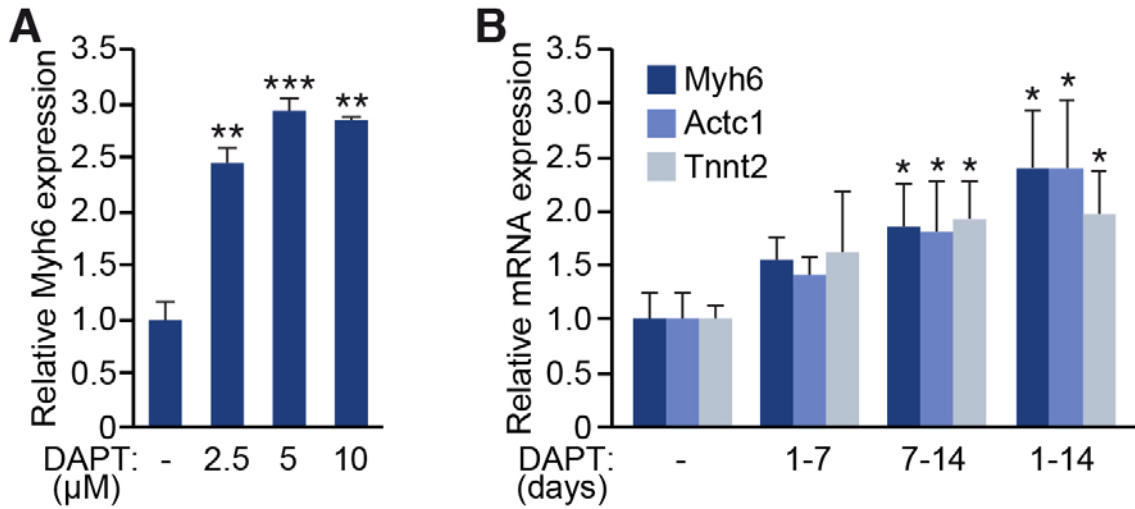

**Figure S1. Optimization of DAPT Concentration and Time of Exposure, Related to Figure 1.**

(A) Analysis of Myh6 expression by q-PCR in  $\alpha$ MHC-GFP MEFs infected with GHMT and treated with DMSO (vehicle), or DAPT at the indicated concentrations for 15 days. (B) Analysis of the expression of different cardiac markers in  $\alpha$ MHC-GFP MEFs infected with GHMT and treated with DMSO (vehicle), or DAPT for the indicated periods of time. Values correspond to the average of three independent biological replicates and s.d. \* $p < 0.05$ ;

\*\* $p < 0.01$ ; \*\*\* $p < 0.001$

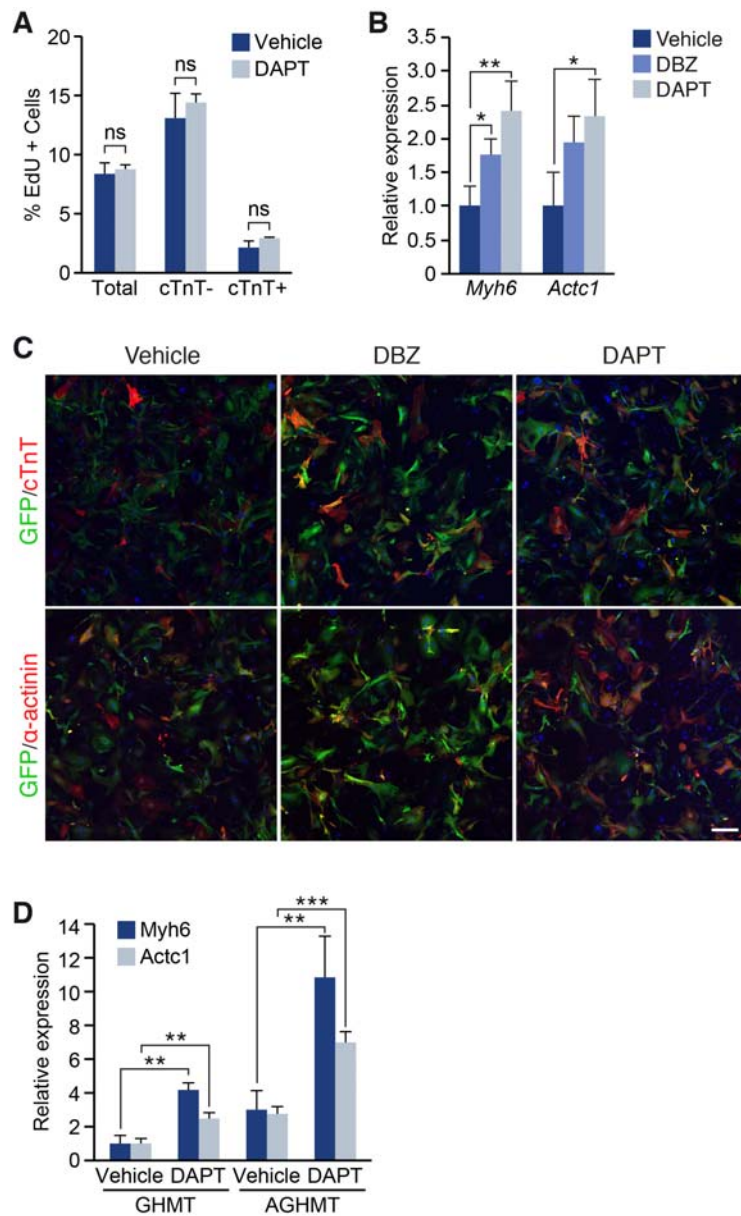

**Figure S2. Notch Inhibition Enhances Cardiac Reprogramming in MEFs and TTFs Without Affecting Cell Proliferation, Related to Figure 1.**

(A) Flow cytometry proliferation analysis in MEFs infected with GHMT, and treated with DMSO (vehicle) or DAPT for 7 days. (B) q-PCR analysis of RNA from  $\alpha$ MHC-GFP MEFs infected with GHMT and treated with DMSO (vehicle), DAPT or DBZ for 2 weeks. (C) Representative images of immunostaining showing GFP, cTnT and  $\alpha$ -actinin expression in  $\alpha$ MHC-GFP MEFs infected with GHMT and treated with DMSO (vehicle), DAPT or DBZ for 2 weeks. Scale bar,

200  $\mu$ M. (D) q-PCR analysis of RNA from TTFs infected with GHMT or AGHMT, and treated with DMSO (vehicle) or DAPT for 2 weeks.

Values correspond to the average of three independent biological replicates and s.d. \* $p < 0.05$ ; \*\* $p < 0.01$ ; \*\*\* $p < 0.001$

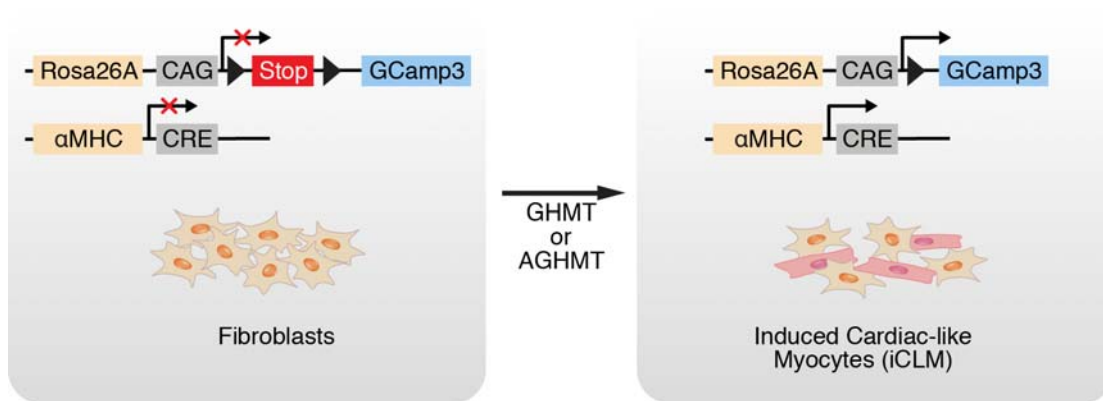

**Figure S3. Strategy for Measuring Calcium Flux with GCaMP MEFs, Related to Figure 1.**

MEFs derived from  $\alpha$ MHC-Cre/Rosa26A-Flox-Stop-Flox-GCaMP3 transgenic mice were reprogrammed to iCLMs by addition of GHMT or AGHMT. Reprogrammed iCLMs exhibit spontaneous cyclic auto-fluorescence concomitant with calcium flux.

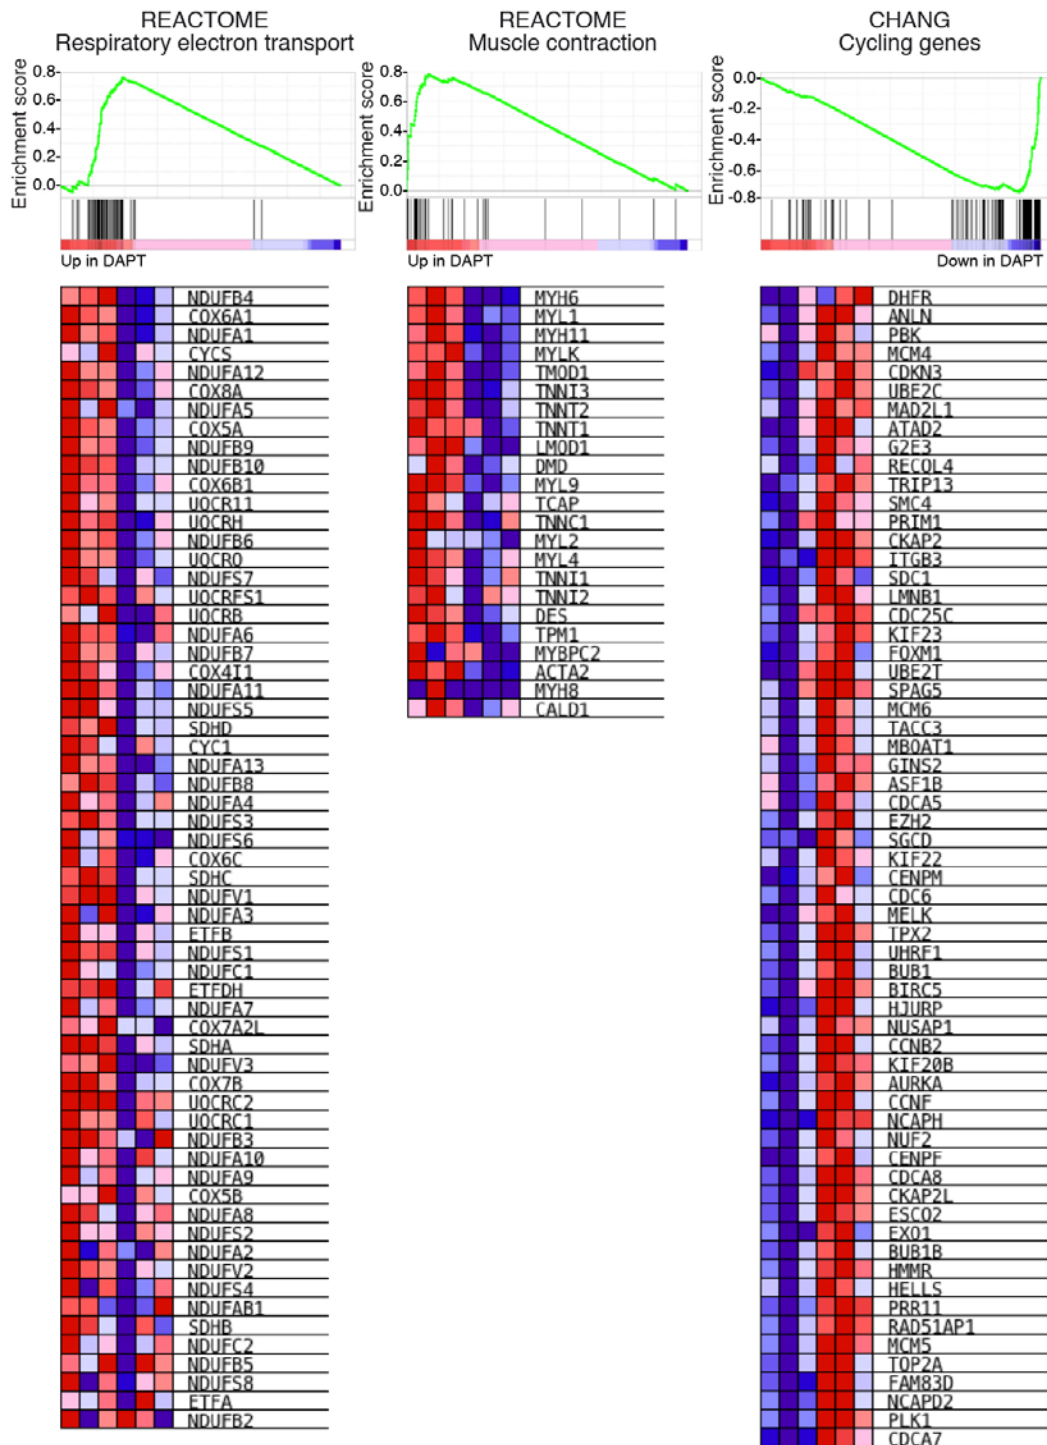

**Figure S4. Gene Set Enrichment Analyses of DAPT-GHMT MEFs, Related to Figure 2.** Enrichment plots of the indicated gene-sets, and their corresponding heat maps. The heat maps were generated with the genes that constitute the core enrichment group.

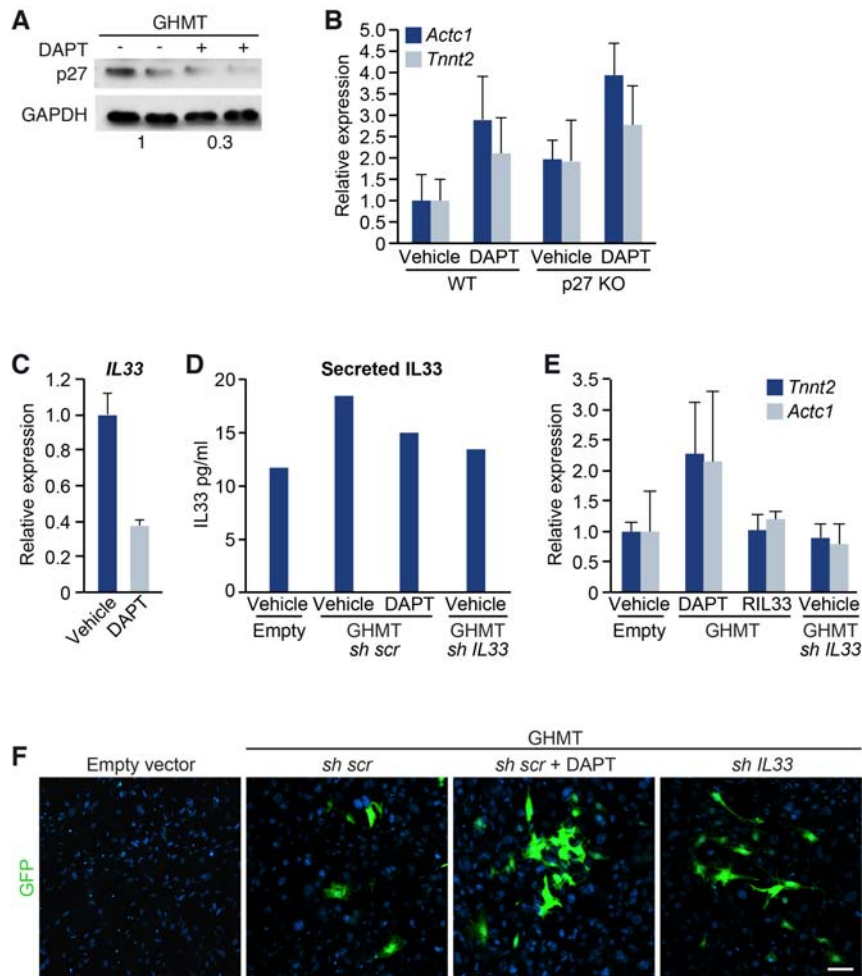

**Figure S5. p27 and the Down-regulation of IL33 Are Not Necessary for DAPT Enhanced Reprogramming, Related to Figure 4.**

(A) Immunoblot showing expression of p27 protein in WT MEFs, at day 15 post-GHMT reprogramming, with or without DAPT. (B) q-PCR analysis showing mRNA expression of *Actc1* and *Tnnt2* in WT or p27 knockout (KO) MEFs, at day 15 post-GHMT reprogramming; n=3 biological replicates. (C) q-PCR showing mRNA expression of IL33 in GHMT-reprogrammed MEFs, treated with DMSO or with DAPT; n=3 biological replicates. (D) Detection of secreted IL33 by ELISA in the conditioned medium of MEFs infected with empty vector, GHMT, GHMT+DAPT and GHMT-*shRNA IL33*. The conditioned medium of

three biological replicates per group was pooled. (E) Relative expression of *Tnnt2* and *Actc1* in MEFs reprogrammed with GHMT or *shIL33*-GHMT, and treated with DMSO, DAPT, or recombinant IL33 (RIL33); n=3 biological replicates. (F) Representative images of immunostaining for GFP in  $\alpha$ MHC-GFP MEFs infected with empty vector, GHMT, shRNA *scramble* (*scr*)-GHMT, *shIL33*-GHMT, and treated with DMSO or DAPT, as indicated. Scale bar, 100  $\mu$ M. Values correspond to the average and s.d.



## SUPPLEMENTARY TABLES

**Table S1. Chemical Compounds Used in Drug Screening, Related to Figure 1**

| <b>Compound name</b>      | <b>Function</b>                  | <b>Concentration</b> | <b>Reference</b>                |
|---------------------------|----------------------------------|----------------------|---------------------------------|
| 616452                    | TGF- $\beta$ R1 kinase inhibitor | 2.0 $\mu$ M          | Maherali and Hochedlinger, 2009 |
| DAPT                      | $\gamma$ -secretase inhibitor    | 2.5 $\mu$ M          | Ichida et al., 2014             |
| GO 6983                   | PKC inhibitor                    | 5.0 $\mu$ M          | Dutta et al., 2011              |
| Vitamin C/L-Ascorbic acid | Demethylate and antioxidant      | 10 ng/ $\mu$ l       | Esteban et al., 2010            |
| OAC2                      | Oct4 activating compound 2       | 1.0 $\mu$ M          | Li et al., 2012                 |
| JQ1                       | BRD4 inhibitor                   | 100 nM               | Shao et al., 2016               |
| human IL-6                | inflammation cytokine            | 10 ng/ml             | Brady et al., 2013              |

**Table S2. Summary of RNA-seq Sequencing Output, Quality Control Filtering and Mapping Results, Related to Figure 2**

| File      | Total    | High Quality | HQ percent | Mapped   | Mapping ratio | Uniquely mapped | Unique mapping ratio |
|-----------|----------|--------------|------------|----------|---------------|-----------------|----------------------|
| GHMTDAPT1 | 37440950 | 34242269     | 91.46%     | 33046876 | 96.51%        | 28810041        | 87.18%               |
| GHMTDAPT2 | 35286645 | 32125046     | 91.04%     | 30989221 | 96.46%        | 27264744        | 87.98%               |
| GHMTDAPT3 | 37758885 | 34381644     | 91.06%     | 33198531 | 96.56%        | 28950023        | 87.20%               |
| GHMTDMSO1 | 39084459 | 35575097     | 91.02%     | 34321515 | 96.48%        | 29994042        | 87.39%               |
| GHMTDMSO2 | 44057960 | 40287324     | 91.44%     | 38927088 | 96.62%        | 34073183        | 87.53%               |
| GHMTDMSO3 | 39767244 | 36303149     | 91.29%     | 35040355 | 96.52%        | 30634853        | 87.43%               |

**Table S3. Up-regulated Genes in DAPT-GHMT MEFs, Related to Figure 2**

| Upregulated genes |            |                |
|-------------------|------------|----------------|
| Gene ID           | foldChange | log2FoldChange |
| KCNJ3             | 3.58       | 1.80           |
| DHRS7C            | 2.76       | 1.43           |
| HSD3B6            | 2.26       | 1.17           |
| GTSF1             | 2.24       | 1.16           |
| CDK15             | 2.20       | 1.12           |
| COX6A2            | 2.17       | 1.12           |
| MYH6              | 2.10       | 1.07           |
| SERPINB6C         | 2.12       | 1.06           |
| PTPRZ1            | 2.05       | 1.04           |
| PLN               | 2.04       | 1.03           |
| ACTN2             | 2.04       | 1.02           |
| GFRA2             | 2.01       | 1.00           |
| TOX3              | 1.98       | 0.98           |
| CAR14             | 1.98       | 0.97           |
| ITGB1BP2          | 1.94       | 0.96           |
| KCNH7             | 1.95       | 0.95           |
| ACTC1             | 1.93       | 0.95           |
| SRL               | 1.92       | 0.94           |
| SLC2A6            | 1.93       | 0.94           |
| SLN               | 1.91       | 0.93           |
| PYGM              | 1.91       | 0.93           |
| TLR2              | 1.91       | 0.93           |
| CHRM2             | 1.88       | 0.91           |
| ATCAYOS           | 1.88       | 0.90           |
| ADAMTS18          | 1.86       | 0.89           |
| RAMP1             | 1.85       | 0.89           |
| FILIP1            | 1.85       | 0.89           |
| MYL7              | 1.85       | 0.89           |
| 4933431K23RIK     | 1.84       | 0.87           |
| PRG4              | 1.82       | 0.86           |
| CES2E             | 1.80       | 0.84           |
| MYL1              | 1.78       | 0.83           |
| SMYD1             | 1.77       | 0.82           |
| ASB2              | 1.76       | 0.82           |
| UNC13C            | 1.73       | 0.79           |
| SCG2              | 1.73       | 0.79           |
| FBXL22            | 1.72       | 0.78           |
| SERPINA3H         | 1.72       | 0.78           |
| TNNI3K            | 1.72       | 0.78           |
| ICAM1             | 1.71       | 0.77           |
| CXCL16            | 1.71       | 0.77           |
| CHCHD10           | 1.70       | 0.76           |
| SERPINA3B         | 1.70       | 0.76           |
| HRC               | 1.70       | 0.76           |
| MYO18B            | 1.69       | 0.76           |
| ALDH1A1           | 1.69       | 0.76           |
| SFRP5             | 1.69       | 0.76           |
| TRDN              | 1.68       | 0.75           |
| PGAM2             | 1.68       | 0.74           |
| SERPINA5          | 1.68       | 0.74           |
| GUCY1A3           | 1.68       | 0.74           |
| PDGFB             | 1.66       | 0.73           |
| MYH11             | 1.64       | 0.72           |
| TNNT3             | 1.64       | 0.72           |
| RBM24             | 1.64       | 0.71           |
| MYLK              | 1.64       | 0.71           |
| TMOD1             | 1.63       | 0.71           |
| CAV3              | 1.63       | 0.71           |
| PPARGC1A          | 1.63       | 0.70           |
| MYOM1             | 1.62       | 0.70           |
| SERPINA3C         | 1.62       | 0.70           |
| COL4A6            | 1.62       | 0.69           |
| SPINT2            | 1.62       | 0.69           |
| CCL7              | 1.59       | 0.67           |
| TNNI3             | 1.59       | 0.67           |
| MYOM2             | 1.59       | 0.67           |
| MRVI1             | 1.58       | 0.66           |
| SPHKAP            | 1.58       | 0.66           |
| CCL2              | 1.58       | 0.66           |
| GCNT1             | 1.57       | 0.65           |
| HAVCR2            | 1.57       | 0.65           |
| UNC13B            | 1.56       | 0.64           |
| TRIM55            | 1.55       | 0.63           |
| SERPIND1          | 1.55       | 0.63           |
| PPP1R12B          | 1.54       | 0.62           |
| ENO3              | 1.54       | 0.62           |
| FAM189A2          | 1.54       | 0.62           |
| TRIM63            | 1.54       | 0.62           |
| SH3BGR            | 1.53       | 0.61           |
| RCSD1             | 1.53       | 0.61           |
| TMEM38A           | 1.52       | 0.60           |
| DOK4              | 1.52       | 0.60           |
| UNC45B            | 1.51       | 0.60           |
| GUCY1B3           | 1.51       | 0.60           |
| ADCY5             | 1.51       | 0.59           |
| MCPT4             | 1.51       | 0.59           |
| SGCG              | 1.51       | 0.59           |
| PPP1R14C          | 1.50       | 0.59           |

**Table S4. Down-regulated Genes in DAPT-GHMT MEFs, Related to Figure 2**

| Downregulated genes |            |                |
|---------------------|------------|----------------|
| Gene ID             | foldChange | log2FoldChange |
| DIO2                | 0,31       | -1,65          |
| NPR3                | 0,34       | -1,55          |
| FAP                 | 0,41       | -1,28          |
| IL33                | 0,45       | -1,15          |
| SRPX2               | 0,47       | -1,09          |
| FAM64A              | 0,47       | -1,08          |
| PLK1                | 0,50       | -1,00          |
| CASC5               | 0,50       | -0,98          |
| CDCA7               | 0,51       | -0,94          |
| ERCC6L              | 0,52       | -0,94          |
| ADAMTS12            | 0,54       | -0,89          |
| C1QTNF3             | 0,54       | -0,87          |
| UPK3B               | 0,55       | -0,86          |
| SHCBP1              | 0,56       | -0,82          |
| FAM105A             | 0,59       | -0,76          |
| WDHD1               | 0,59       | -0,75          |
| FAM20A              | 0,60       | -0,73          |
| MCM5                | 0,61       | -0,72          |
| NR4A2               | 0,62       | -0,69          |
| LOXL3               | 0,62       | -0,68          |
| PRR11               | 0,62       | -0,68          |
| ADAMTS15            | 0,63       | -0,66          |
| LPIN3               | 0,64       | -0,65          |
| PYCR1               | 0,64       | -0,65          |
| SLC2A13             | 0,66       | -0,61          |
| SKP2                | 0,66       | -0,60          |
| SORCS2              | 0,66       | -0,59          |

## **SUPPLEMENTARY VIDEOS**

**Video S1.** Spontaneously Beating MEFs at Day 18 Following Reprogramming by GHMT and DAPT.

**Video S2.** Spontaneously Beating MEFs at Day 18 Following Reprogramming by AGHMT and DAPT.
